# Supplementary material for: Achieving efficient and large-scale preparation of mesophase-nylon 11 film by random copolymerization of nylon 11 and nylon 611
Source: Royal Society of Chemistry journal article supplement (doi:10.1039/d0ra08278c), 2020-01-01
Supplement: d0ra08278c1.pdf [file d0ra08278c1.pdf]

## Achieving efficient and large-scale preparation of mesophase- Nylon 11 film by random copolymerization of Nylon 11 and Nylon 611

Lei Huang<sup>a</sup>, Dandan Yuan<sup>a</sup>, Yunyun Yang<sup>a</sup> and Xufu Cai<sup>\*a</sup>

<sup>a</sup>: College of Polymer Science and Materials, The State Key Laboratory of Polymer Materials Engineering, Sichuan University, Chengdu 610065, China

\*: corresponding authors, Prof. Xufu Cai, email:caixf2008@scu.edu.cn;

### 1. Thermal Data for Compressed (C) and Compressed and Annealed (CA) Nylon Films

Table S1 Thermal Data for C (left) and CA (right) Nylon Films

| C samples | $\Delta H$<br>(J g <sup>-1</sup> ) | T <sub>m</sub><br>(°C) | T <sub>g</sub><br>(°C) | Crystallinity<br>(wt.%) <sup>a</sup> | CA samples | $\Delta H$<br>(J g <sup>-1</sup> ) | T <sub>m</sub><br>(°C) | Crystallinity<br>(wt.%) <sup>a</sup> |
|-----------|------------------------------------|------------------------|------------------------|--------------------------------------|------------|------------------------------------|------------------------|--------------------------------------|
| PA11      | 38.15                              | 183.7                  | 51.12                  | 15.64                                | PA11       | 39.88                              | 183.9                  | 16.34                                |
| coPA-1    | 27.25                              | 173.2                  | 50.25                  | 11.12                                | coPA-1     | 30.76                              | 172.6                  | 12.55                                |
| coPA-2    | 27.14                              | 165.4                  | 47.06                  | 11.03                                | coPA-2     | 29.48                              | 164.8                  | 11.98                                |
| coPA-3    | 27.85                              | 149.9                  | 44.59                  | 11.26                                | coPA-3     | 31.16                              | 149.0                  | 11.26                                |
| coPA-4    | 30.05                              | 146.1                  | 44.23                  | 12.09                                | coPA-4     | 30.21                              | 145.3                  | 12.15                                |
| coPA-5    | 32.10                              | 147.6                  | 38.52                  | 12.85                                | coPA-5     | 31.82                              | 146.6                  | 12.74                                |

110

### 2. Infrared spectrum and <sup>1</sup>H NMR spectrum of 611 salt

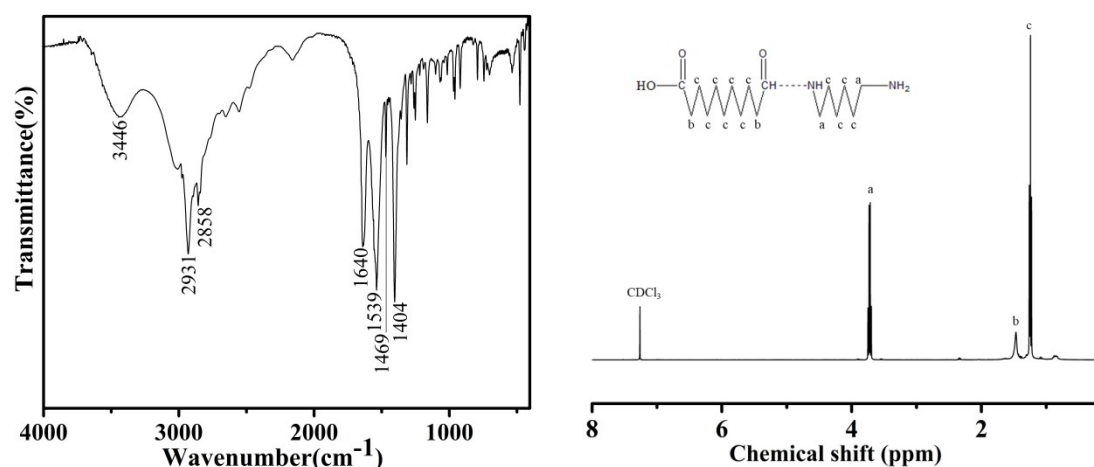

Fig. S1 Infrared spectrum (left) and <sup>1</sup>H NMR spectrum (right) of 611 salt

For infrared spectrum: 3446 cm<sup>-1</sup> (N-H stretching), 2931 and 2858 cm<sup>-1</sup> (-CH<sub>2</sub>- stretching), 1640 cm<sup>-1</sup> (the

characteristic peak of COO- and  $NH_3^+$ ,  $1539\text{ cm}^{-1}$  (N-H bending),  $1469$  and  $1404\text{ cm}^{-1}$  (COO- stretching).

For  $^1\text{H}$  NMR spectrum:  $\delta 3.73(4\text{H},\text{H-a})$ ,  $\delta 1.43(4\text{H},\text{H-b})$ ,  $\delta 1.31(22\text{H},\text{H-c})$ .

### 3. Thermogravimetric curves of nylon samples

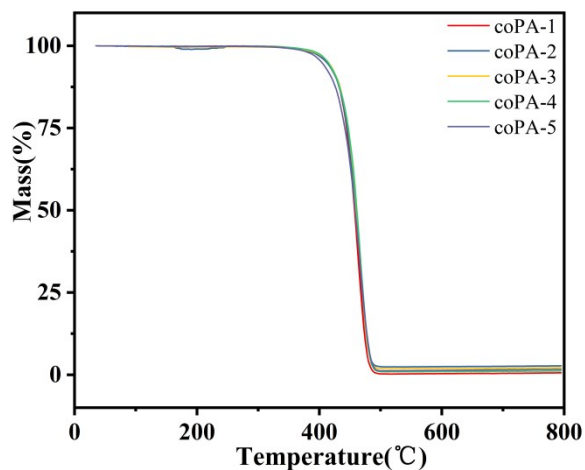

Table S2Main data Collected from TG curves

| Samples | T2%<br>(°C) | T5%<br>(°C) |
|---------|-------------|-------------|
| coPA-1  | 390         | 414         |
| coPA-2  | 389         | 412         |
| coPA-3  | 393         | 414         |
| coPA-4  | 395         | 414         |
| coPA-5  | 381         | 404         |

Fig. S2 Thermogravimetric curves of nylon samples

All the nylon copolymers had excellent thermal stability, and the  $T_m$  of all nylon copolymers was lower than  $180^\circ\text{C}$ , indicating the nylon copolymer is suitable for hot-processing.

### 4. DSC heating runs at $10^\circ\text{C}/\text{min}$ , $20^\circ\text{C}/\text{min}$ and $40^\circ\text{C}/\text{min}$ of PA11

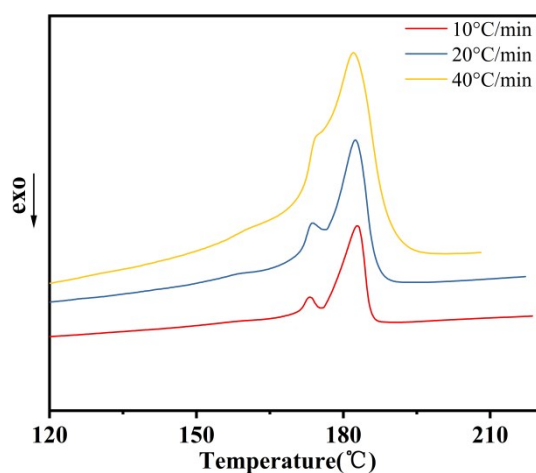

Fig. S3 DSC heating runs at  $10^\circ\text{C}/\text{min}$ ,  $20^\circ\text{C}/\text{min}$  and  $40^\circ\text{C}/\text{min}$  of PA11

## 5. Non-isothermal Crystallization Kinetic Analysis

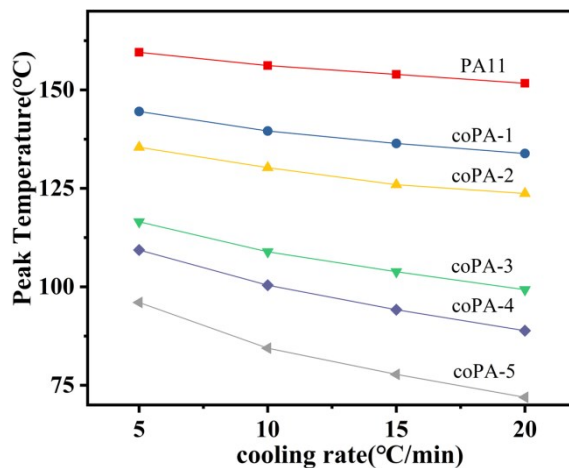

Fig. S4 the relationship of crystallization peak temperature with cooling rate for nylon samples

The crystallization peak temperature of all nylon copolymers decreased with the increase of cooling rate, it was attributed to the thermal hysteresis at the cooling process. Moreover, increasing the chemical heterogeneity, the hysteresis was more obvious.

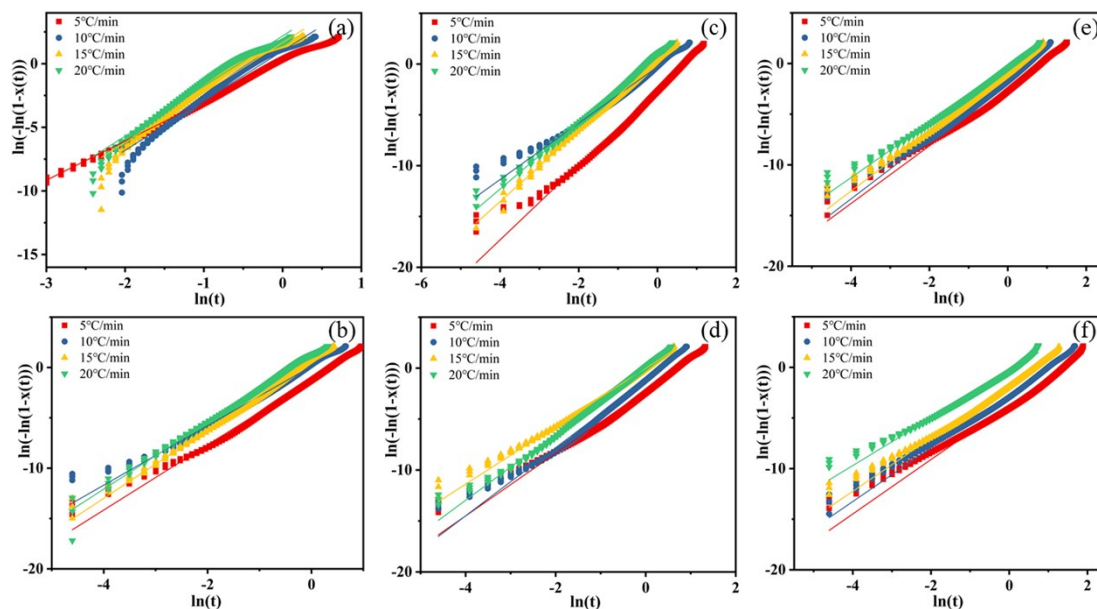

Fig. S5 The  $\ln[-\ln(1-X(t))]$  relating to  $\ln(t)$  for nonisothermal crystallization process

Table S3 The kinetic parameters relating to non-isothermal crystallization of nylon samples

| Samples | $\Phi$ ( $^{\circ}\text{C}/\text{min}$ ) | n     | Average of n | Zt    | Zc    | R2     |
|---------|------------------------------------------|-------|--------------|-------|-------|--------|
| PA11    | 5                                        | 3.079 | 3.711        | 1.087 | 1.017 | 0.9956 |
|         | 10                                       | 3.909 |              | 2.749 | 1.106 | 0.9708 |
|         | 15                                       | 3.917 |              | 5.240 | 1.117 | 0.9673 |
|         | 20                                       | 3.938 |              | 8.864 | 1.115 | 0.9723 |
| coPA-1  | 5                                        | 3.237 | 3.228        | 0.299 | 0.785 | 0.9921 |
|         | 10                                       | 2.950 |              | 1.124 | 1.012 | 0.9899 |
|         | 15                                       | 3.403 |              | 1.864 | 1.042 | 0.9964 |
|         | 20                                       | 3.323 |              | 3.376 | 1.063 | 0.9952 |
| coPA-2  | 5                                        | 3.691 | 3.306        | 0.079 | 0.602 | 0.9899 |
|         | 10                                       | 2.774 |              | 0.766 | 0.974 | 0.9865 |
|         | 15                                       | 3.473 |              | 1.443 | 1.025 | 0.9987 |
|         | 20                                       | 3.286 |              | 2.322 | 1.043 | 0.9966 |
| coPA-3  | 5                                        | 3.074 | 3.130        | 0.111 | 0.644 | 0.9891 |
|         | 10                                       | 3.344 |              | 0.328 | 0.894 | 0.9901 |
|         | 15                                       | 2.845 |              | 0.990 | 0.999 | 0.9928 |
|         | 20                                       | 3.258 |              | 1.067 | 1.003 | 0.9954 |
| coPA-4  | 5                                        | 2.842 | 2.853        | 0.087 | 0.614 | 0.9908 |
|         | 10                                       | 2.952 |              | 0.213 | 0.857 | 0.9898 |
|         | 15                                       | 2.919 |              | 0.404 | 0.941 | 0.9941 |
|         | 20                                       | 2.697 |              | 0.628 | 0.977 | 0.9954 |
| coPA-5  | 5                                        | 2.687 | 2.578        | 0.024 | 0.475 | 0.9812 |
|         | 10                                       | 2.648 |              | 0.070 | 0.767 | 0.9930 |
|         | 15                                       | 2.628 |              | 0.178 | 0.891 | 0.9928 |
|         | 20                                       | 2.349 |              | 0.741 | 0.985 | 0.9870 |
